# Supplementary material for: Self-assembly and liquid-crystalline supramolecular organizations of semifluorinated block co-dendritic supermolecules
Source: Royal Society of Chemistry journal article supplement (doi:10.1039/c1nj20530g), 2011-10-14
Supplement: c1nj20530g.pdf [file c1nj20530g.pdf]

**Supporting Information to:**

**Self-assembly and liquid-crystalline supramolecular organizations  
of semifluorinated block co-dendritic supermolecules**

Izabela Bury,<sup>a</sup> Benoît Heinrich,<sup>a</sup> Cyril Bourgogne,<sup>a</sup> Georg H. Mehl,<sup>b</sup> Daniel Guillon<sup>a</sup> and  
Bertrand Donnio,<sup>\*a</sup>

<sup>a</sup>Institut de Physique et Chimie des Matériaux de Strasbourg – IPCMS, UMR 7504 –  
CNRS/Université de Strasbourg, 23, rue du Loess, BP 43, F-67034 Strasbourg Cedex 2,  
France.

<sup>b</sup>University of Hull, Department of Chemistry, Cottingham Road, Hull, HU67RX, UK

Corresponding author : e-mail: [bdonnio@ipcms.u-strasbg.fr](mailto:bdonnio@ipcms.u-strasbg.fr), tel: +33 388107156, fax: +33  
388107246

## **TABLE OF CONTENT**

- 1. EXPERIMENTAL TECHNIQUES**
- 2. SELECTION OF OPTICAL TEXTURES**
- 3. MOLECULAR DYNAMICS**
- 4. X-RAY DIFFRACTION**
- 5. DIFFERENTIAL SCANNING CALORIMETRY**

## 1. EXPERIMENTAL TECHNIQUES

$^1\text{H}$ ,  $^{19}\text{F}$  and  $^{13}\text{C}$  NMR spectra were recorded on a Bruker AVANCE 300 (300MHz) spectrometer (IPCMS) and on a Bruker DRX 500 (500MHz) at University of Hull. The internal references of the spectrum correspond to the peak of the non deuterated solvent ( $\text{CDCl}_3$  7.27ppm, THF- $d_8$  1.7 and 3.55ppm, or  $(\text{CD}_3)_2\text{CO}$  2.04 and 2.77ppm).

MALDI-TOF spectra were recorded on a Bruker biflex III spectrometer in a dithranol matrix (1,8,9-anthracenetriol).

Elemental analyses were realized at the Charles Sadron Institute Strasbourg (France) and at the chemistry department of the University of Hull (England).

The optical textures of the mesophases were studied with a Leitz polarizing microscope equipped with a Mettler FP82 hot-stage and an FP80 central processor.

The transition temperatures and enthalpies were measured by differential scanning calorimetry with a TA Instruments DSC-Q1000 instrument operated at a scanning rates of 1 to  $5^\circ\text{C min}^{-1}$  on heating and on cooling.

The TGA measurements were carried out on a SDTQ 600 apparatus at scanning rate of  $10^\circ\text{C min}^{-1}$ .

The XRD patterns were obtained with three different experimental set-ups (I, II, III). In all cases, a linear monochromatic Cu- $\text{K}\alpha_1$  beam ( $\lambda = 1.5405\text{\AA}$ ) was obtained using a sealed-tube generator (900W) equipped with a bent quartz monochromator. . In all cases, the crude powder was filled in Lindemann capillaries of 1 mm diameter and 10  $\mu\text{m}$  wall-thickness. An initial set of diffraction patterns was recorded on an image plate (scanned by STORM 820 from Molecular Dynamics with 50 $\mu\text{m}$  resolution); periodicities up to 80  $\text{\AA}$  can be measured, and the sample temperature controlled to within  $\pm 0.3^\circ\text{C}$  from 20 to  $350^\circ\text{C}$ . The second set of diffraction patterns was recorded with a curved Inel CPS 120 counter gas-filled detector linked to a data acquisition computer; periodicities up to 70  $\text{\AA}$  can be measured, and the sample temperature controlled to within  $\pm 0.01^\circ\text{C}$  from 20 to  $200^\circ\text{C}$ . Alternatively, patterns were also recorded on an image plate; periodicities up to 120  $\text{\AA}$  can be measured. Finally, the last set of diffraction patterns was recorded on image plate, and periodicities up to 350  $\text{\AA}$  can be measured, and the sample temperature controlled to within  $\pm 0.1^\circ\text{C}$  from 20 to  $200^\circ\text{C}$ . In each case, exposure times were varied from 1 to 24 h.

The molecular modeling calculations were performed on an SGI Origin 200 4 CPU computer and on an SGI Octane<sup>2</sup> workstation using the DISCOVER 3 molecular mechanics package

from Accelrys ([www.accelrys.com](http://www.accelrys.com)) with the pcff force field. For both smectic and columnar models, prior to the dynamics, the systems were minimized to a gradient of  $0.5\text{kcal mol}^{-1}$ . The simulation then consisted of a 100ps isotherm at 373K in the NVT-PBC ensemble and with a 1 fs time step.

## 2. SELECTION OF OPTICAL TEXTURES

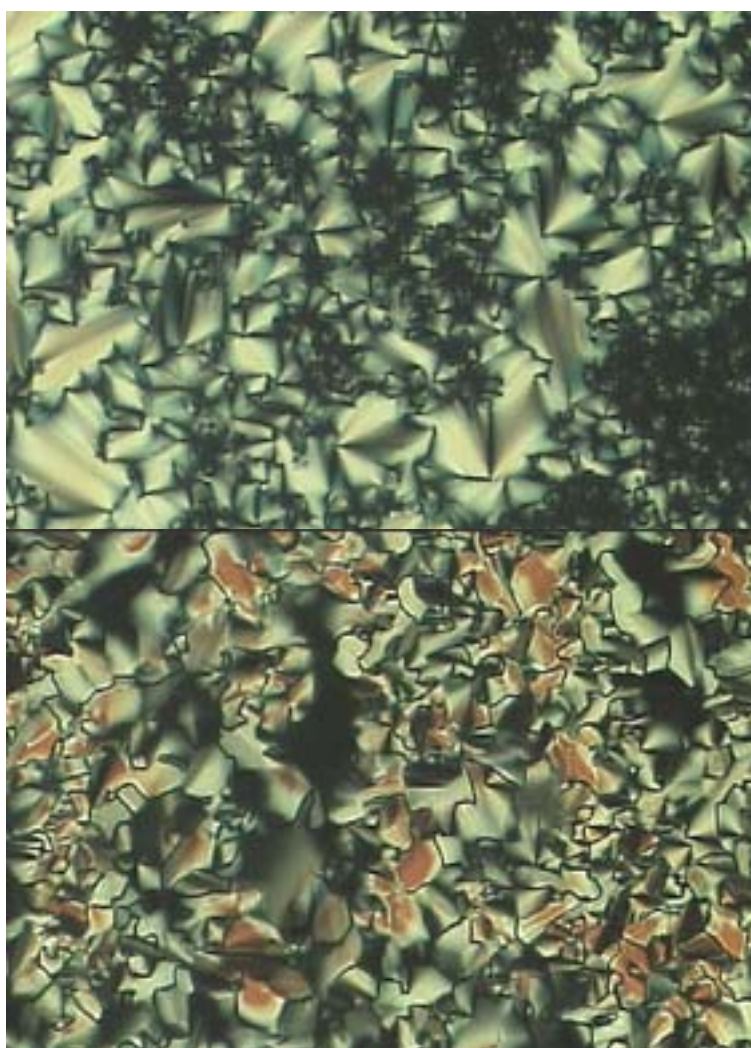

**Figure S1** Optical textures of the  $\text{Col}_r$  phase of  $(3,4)^1(3,5)^2\text{H-F}^1$  at  $T=42^\circ\text{C}$  and  $48^\circ\text{C}$  (on heating)

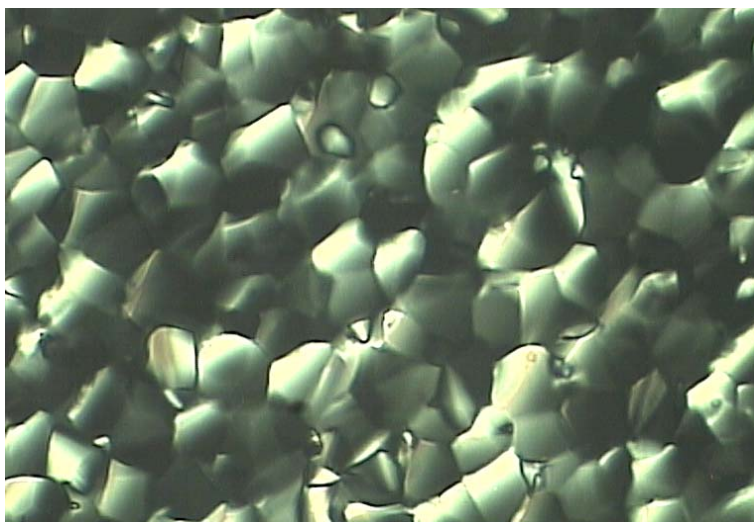

**Figure S2** Optical texture (cylindrical domains) of the Col<sub>h</sub> phase of (3,4)<sup>1</sup>(3,5)<sup>2</sup>H-F<sup>1</sup> at T=43°C (on cooling)

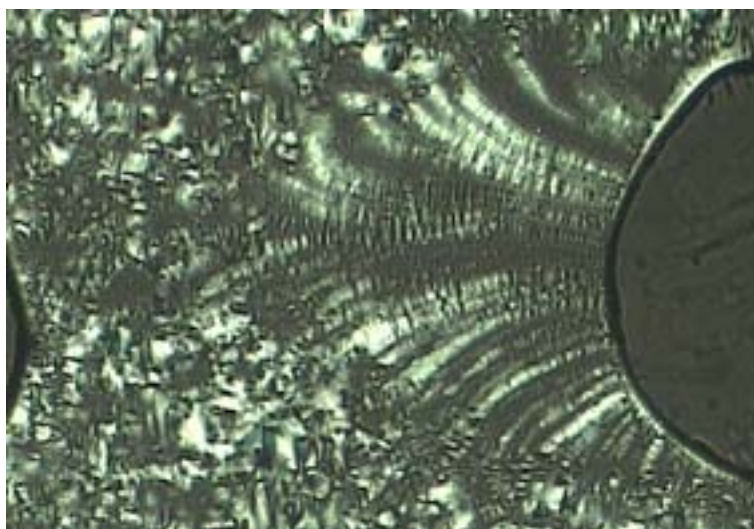

**Figure S3** Optical texture (myelinic) of the lamellar phase (Lam) of (3,4,5)<sup>1</sup>H-F<sup>2</sup> at T=47°C (on cooling)

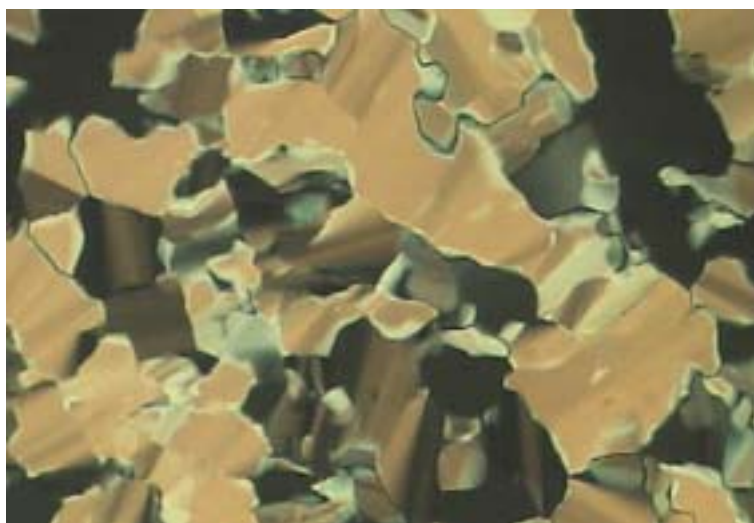

**Figure S4** Optical texture of the Col<sub>h1</sub> phase of (3,4,5)<sup>1</sup>(3,5)<sup>1</sup>H-F<sup>2</sup> at T=60°C (on cooling)

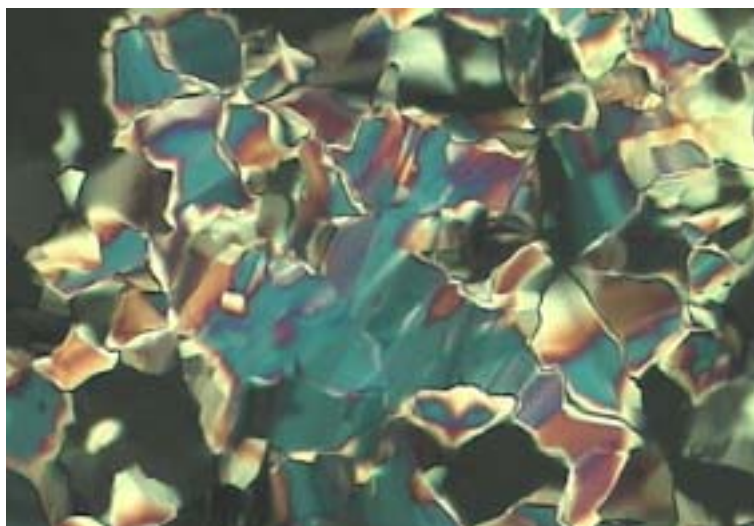

**Figure S5** Optical texture of the Col<sub>h1</sub> phase near the transition of (3,4,5)<sup>1</sup>(3,5)<sup>1</sup>**H-F**<sup>2</sup> at  $T=30^{\circ}\text{C}$  (on cooling)

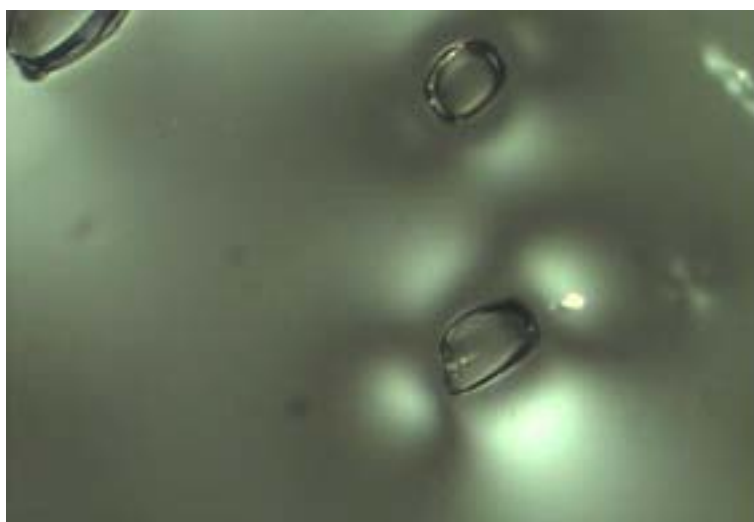

**Figure S6** Low birefringence, optical texture of the monoclinic phase of (3,4,5)<sup>1</sup>(3,5)<sup>2</sup>**H-F**<sup>2</sup> at  $T=40^{\circ}\text{C}$  (on cooling)

### 3. MOLECULAR DYNAMICS

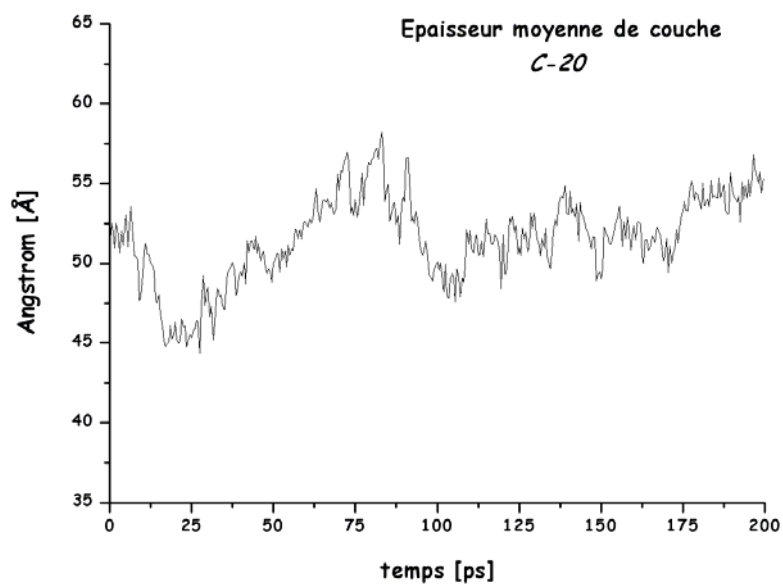

**Figure S7** Variation of the bilayer thickness of the lamellar phase of (3,4,5)<sup>1</sup>*H-F*<sup>2</sup> (C20) as a function of time.

#### 4. X-RAY DIFFRACTION

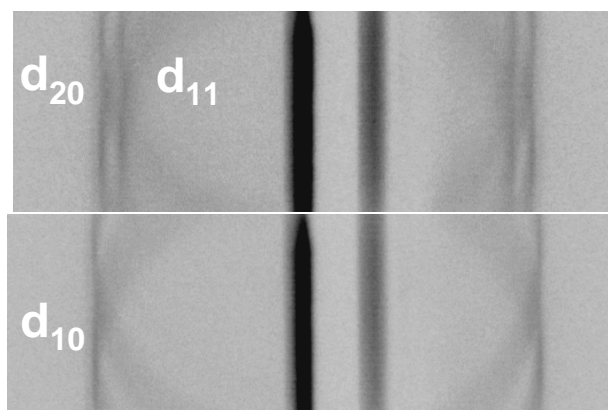

**Figure S8** Small-angle X-ray diffraction patterns (image plates, setup II) of the columnar rectangular phase, Col<sub>r</sub>, at  $T=30^{\circ}\text{C}$  (top), and of columnar hexagonal phase, Col<sub>h</sub>, at  $T=45^{\circ}\text{C}$  (bottom) of  $(3,4)^1(3,5)^2\text{H-F}^1$ .

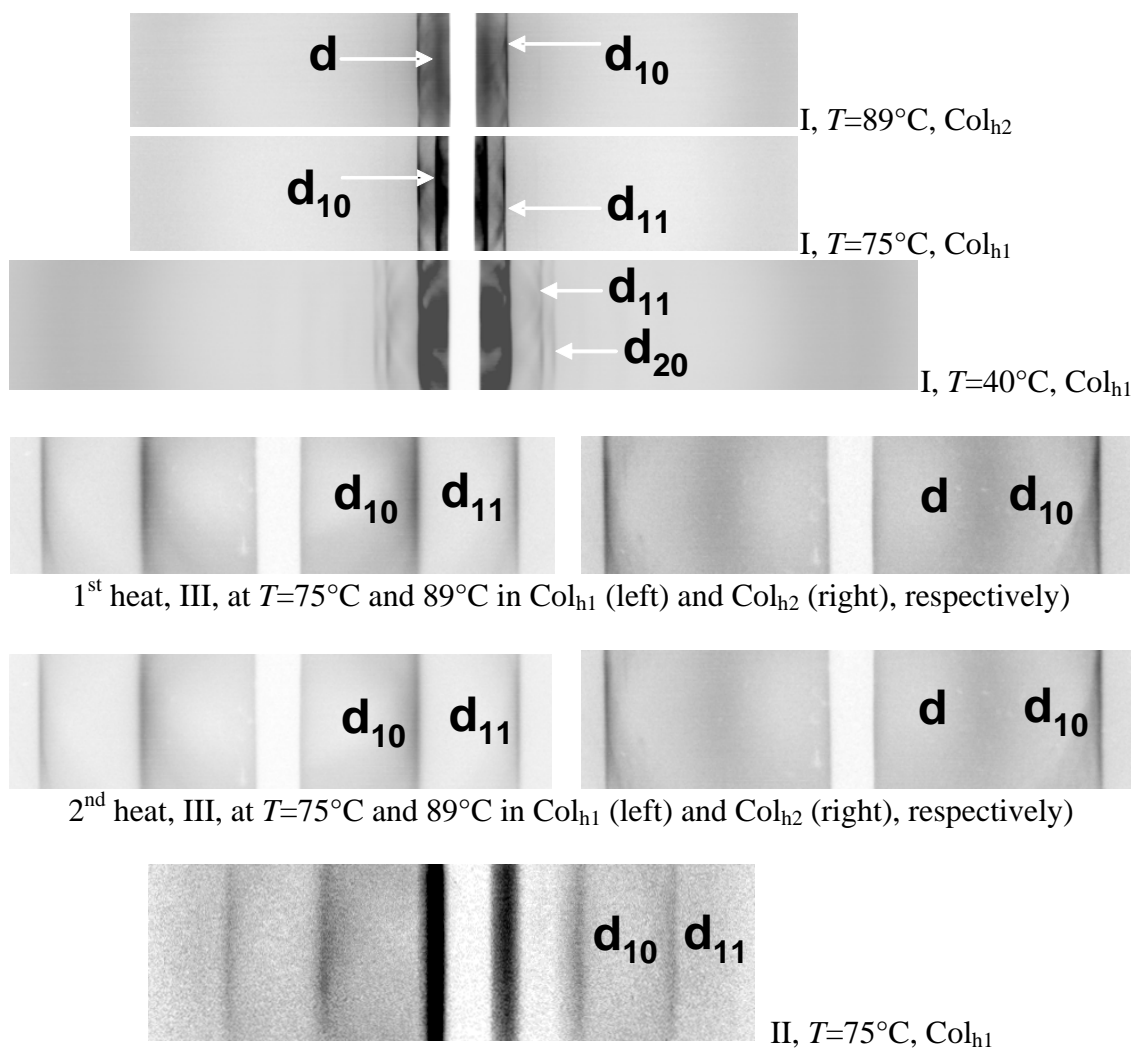

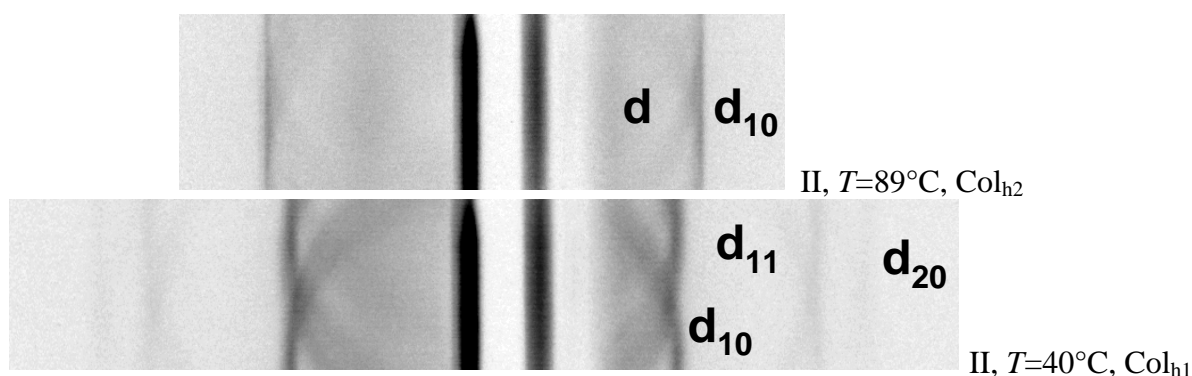

**Figure S9** Small-angle X-ray diffraction patterns (image plates, setups I, II and III) of the columnar hexagonal phases,  $\text{Col}_{\text{h}1}$  and  $\text{Col}_{\text{h}2}$ , of  $(3,4)^1(3,5)^2\text{H-F}^2$ .

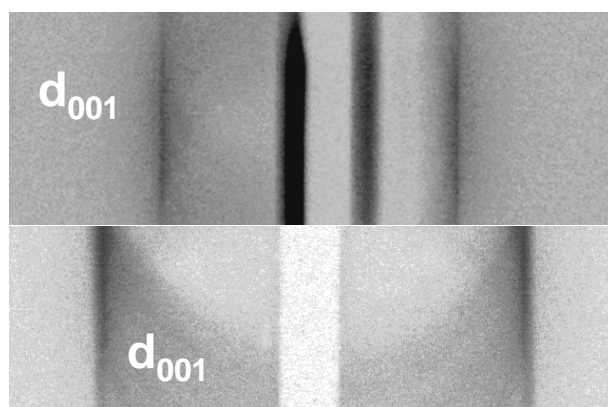

**Figure S10** Small-angle X-ray diffraction patterns (image plates, setups II and III) of the lamellar phase of  $(3,4,5)^1\text{H-F}^2$  ( $T=45^{\circ}\text{C}$ ).

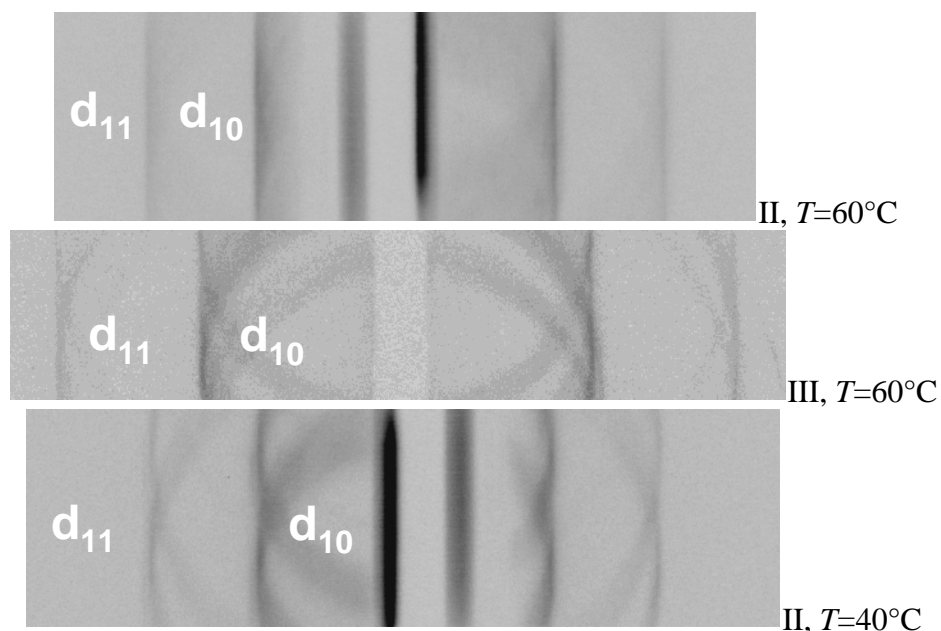

**Figure S11** Small-angle X-ray diffraction patterns (image plates, setups II and III) of the columnar hexagonal phase of  $(3,4,5)^1(3,5)^1\text{H-F}^2$ .

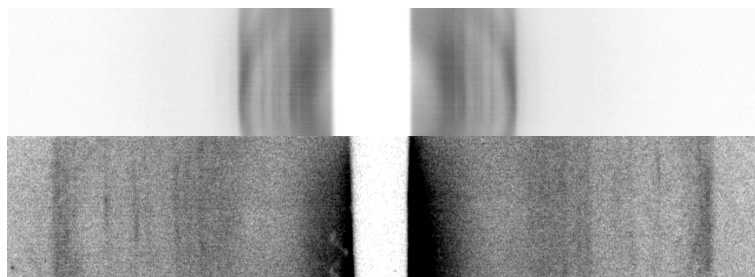

**Figure S12** Small-angle X-ray diffraction patterns (image plates, setups I and II) of the monoclinic phase of  $(3,4,5)^1(3,5)^2\text{H-F}^2$  ( $T=45^\circ\text{C}$ ).

Indexation of the monoclinic phase of  $(3,4,5)^1(3,5)^2\text{H-F}^2$  at  $T = 45^\circ\text{C}$

**Table S1.** Monoclinic lattice n°1

| N° | $2\theta_{\text{obs}}^\circ$ | $d_{\text{obs}} \text{ \AA}$ | I  | hkl              | $2\theta_{\text{cal}}^\circ$ | $d_{\text{cal}} \text{ \AA}$ |
|----|------------------------------|------------------------------|----|------------------|------------------------------|------------------------------|
| 1  | 1.25                         | 70.5                         | W  | 0 0 2            | 1.249                        | 70.65                        |
| 2  | 1.36                         | 64.7                         | M  | 1 -1 0           | 1.347                        | 65.55                        |
| 3  | 1.52                         | 58.0                         | S  | 1 0 0            | 1.514                        | 58.30                        |
| 4  | 1.65                         | 53.6                         | W  | 1 0 -1 / 1 0 1   | 1.638                        | 53.89                        |
| 5  | 1.75                         | 50.5                         | S  | 0 1 0            | 1.758                        | 50.22                        |
| 6  | 2.00                         | 44.2                         | W  | 1 0 -2 / 1 0 2   | 1.963                        | 44.97                        |
| 7  | 2.11                         | 41.8                         | W  | 0 1 -2 / 0 1 2   | 2.156                        | 40.93                        |
|    |                              |                              |    | 2 -1 0           | 2.263                        | 39.00                        |
| 8  | 2.33                         | 37.8                         | M  | 2 -1 -1 / 2 -1 1 | 2.347                        | 37.60                        |
| 9  | 2.70                         | 32.7                         | W  | 2 -2 0           | 2.693                        | 32.77                        |
|    |                              |                              |    | 1 -2 0           | 2.741                        | 32.20                        |
| 10 | 2.76                         | 31.9                         | S  | 2 -2 -1 / 2 -2 1 | 2.765                        | 31.93                        |
| 11 | 2.97                         | 29.8                         | VW | 2 -2 -2 / 2 -2 2 | 2.969                        | 29.73                        |
| 12 | 3.26                         | 27.1                         | VW | 1 1 -2 / 1 1 2   | 3.242                        | 27.23                        |
|    |                              |                              |    | 2 0 -2 / 2 0 2   | 3.276                        | 26.95                        |

$a = 78.5(74) \text{ \AA}$ ;  $b = 67.6(84) \text{ \AA}$ ;  $c = 141.3 \text{ \AA}$ ;  $\alpha = \beta = 90^\circ$ ;  $\gamma = 132.1^\circ$ ;  $V = 557(568) \text{ \AA}^3$ ;  $A = a \times b \sin(\gamma) = 3946 \text{ \AA}^2$

**Table S2.** Monoclinic lattice n°2

| N° | $2\theta_{\text{obs}}^\circ$ | $d_{\text{obs}} \text{ \AA}$ | I  | hkl              | $2\theta_{\text{cal}}^\circ$ | $d_{\text{cal}} \text{ \AA}$ |
|----|------------------------------|------------------------------|----|------------------|------------------------------|------------------------------|
| 1  | 1.25                         | 70.5                         | W  | 0 0 2            | 1.249                        | 70.65                        |
| 2  | 1.36                         | 64.7                         | M  | 1 -1 0           | 1.347                        | 65.54                        |
| 3  | 1.52                         | 58.0                         | S  | 1 0 0            | 1.511                        | 58.40                        |
|    |                              |                              |    | 1 0 -1 / 1 0 1   | 1.635                        | 53.97                        |
| 4  | 1.65                         | 53.6                         | W  | 0 1 0            | 1.645                        | 53.66                        |
| 5  | 1.75                         | 50.5                         | S  | 0 1 -1 / 0 1 1   | 1.760                        | 50.16                        |
| 6  | 2.00                         | 44.2                         | W  | 1 0 -2 / 1 0 2   | 1.961                        | 45.01                        |
| 7  | 2.11                         | 41.8                         | W  | 0 1 -2 / 0 1 2   | 2.066                        | 42.73                        |
| 8  | 2.33                         | 37.8                         | M  | 2 -1 0           | 2.343                        | 37.67                        |
| 9  | 2.70                         | 32.7                         | W  | 2 -2 0           | 2.694                        | 32.77                        |
| 10 | 2.76                         | 31.9                         | S  | 2 -2 -1 / 2 -2 1 | 2.765                        | 31.92                        |
|    |                              |                              |    | 1 1 -1 / 1 1 -1  | 2.925                        | 30.17                        |
| 11 | 2.97                         | 29.8                         | VW | 2 -2 -2 / 2 -2 2 | 2.970                        | 29.73                        |
| 12 | 3.26                         | 27.1                         | VW | 2 0 -2 / 2 0 2   | 3.271                        | 26.99                        |
|    |                              |                              |    | 0 2 0            | 3.290                        | 26.83                        |

$a = 75.9(033) \text{ \AA}$ ;  $b = 69.7(427) \text{ \AA}$ ;  $c = 141.3 \text{ \AA}$ ;  $\alpha = \beta = 90^\circ$ ;  $\gamma = 129.7^\circ$ ;  $V = 575(511) \text{ \AA}^3$ ;  $A = a \times b \sin(\gamma) = 4073 \text{ \AA}^2$

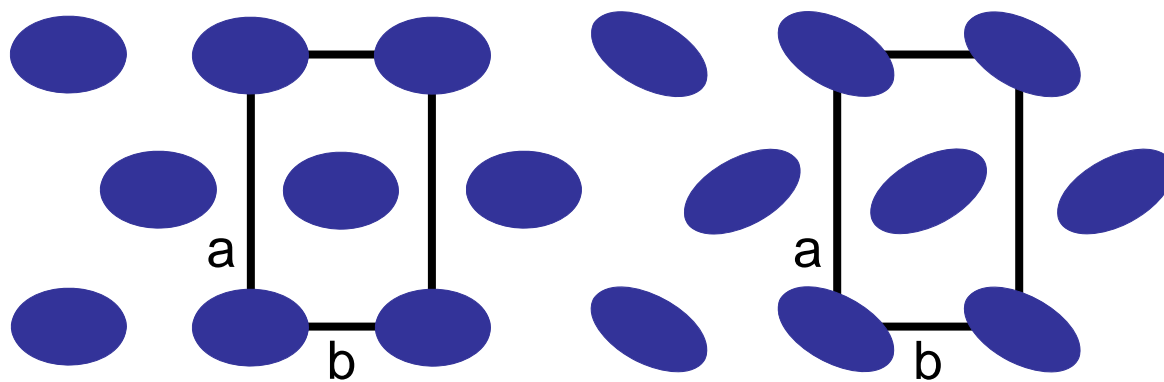

**Figure S13** Schematic representation of the two rectangular symmetries, centred,  $c2mm$ , and the non-centred,  $p2gg$ .

## 5. DIFFERENTIAL SCANNING CALORIMETRY

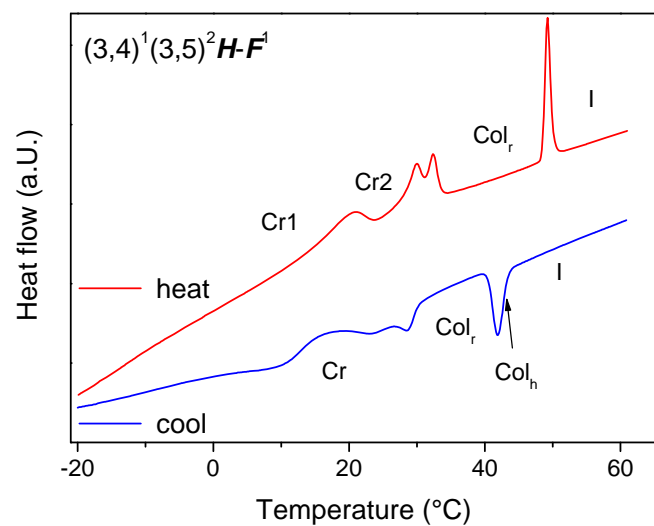

**Figure S14** DSC traces of  $(3,4,5)^1(3,5)^1H-F^2$  (2<sup>nd</sup> cooling cycle, 3<sup>rd</sup> heating cycle).

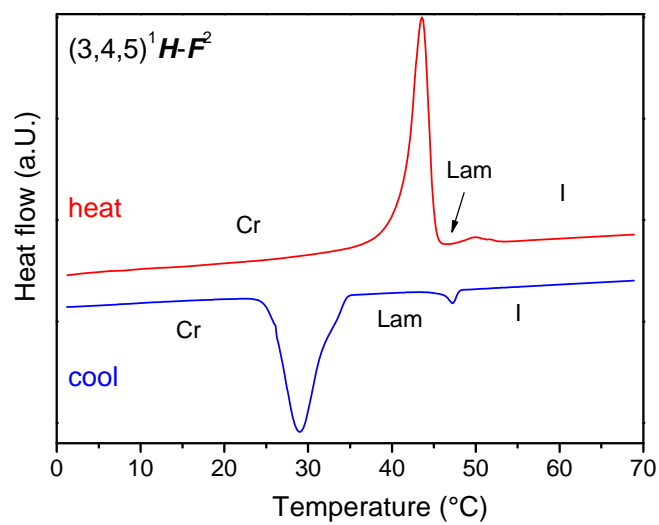

**Figure S15** DSC traces of  $(3,4,5)^1H-F^2$  (2<sup>nd</sup> cooling cycle, 3<sup>rd</sup> heating cycle).

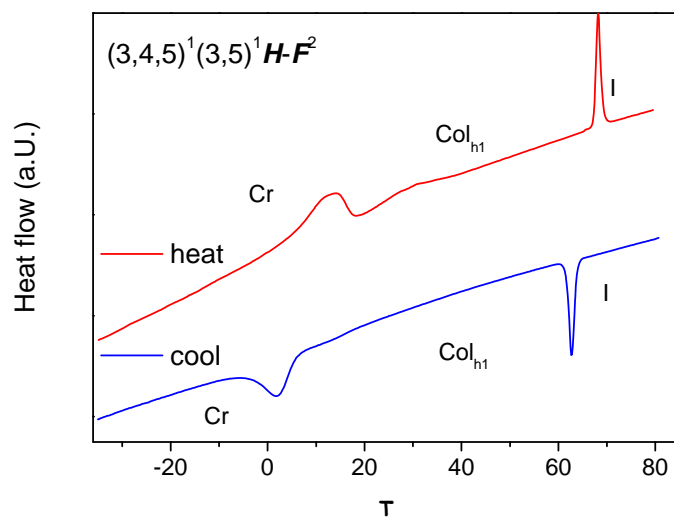

**Figure S16** DSC traces of  $(3,4,5)^1(3,5)^1\text{H-F}^2$  (2<sup>nd</sup> cooling cycle, 3<sup>rd</sup> heating cycle).

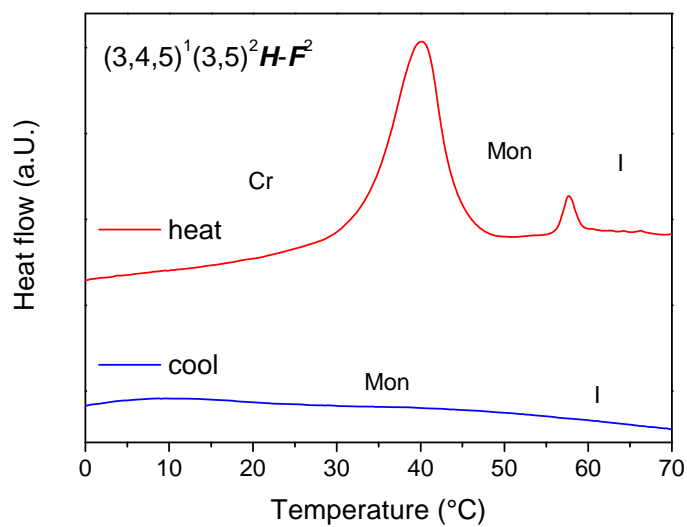

**Figure S17** DSC traces of  $(3,4,5)^1(3,5)^2\text{H-F}^2$  (2<sup>nd</sup> cooling cycle, 3<sup>rd</sup> heating cycle).
